# Supplementary material for: Autophagy Is a Crucial Path in Chondrogenesis of Adipose-Derived Mesenchymal Stromal Cells Laden in Hydrogel
Source: MDPI journal article supplement (doi:10.3390/gels8120766), 2022-11-24
Supplement: s1 [file s1]

**Table S1:** Oligonucleotide primers used for real-time PCR.

| Target Gene     | Primers (forward and reverse)                  | Product size (bp) | GenBank Accession No.                      | Primer Efficiency (%) |
|-----------------|------------------------------------------------|-------------------|--------------------------------------------|-----------------------|
| <i>ACAN</i>     | TCGAGGACAGCGAGGCC<br>TCGAGGGTGTAGCGTGTAGAGA    | 85                | NM_001135                                  | 96,5                  |
| <i>COL2A1</i>   | GACAATCTGGCTCCCAAC<br>ACAGTCTTGCCCCACTTAC      | 228               | NM_001844                                  | 98,1                  |
| <i>BECN1</i>    | Biorad unique assay ID:<br>qHsaqHsaCID0016032  | 102               | NC_000017.10<br>NT_010783.15               | 102                   |
| <i>MAP1LC3B</i> | Biorad unique assay ID:<br>qHsaCEP0041298      | 87                | NC_000016.9<br>NT_010498.15                | 97                    |
| <i>SQSTM1</i>   | Biorad unique assay ID:<br>qHsaCID0005989CSPG4 | 97                | NC_000005.9<br>NG_011342.1<br>NT_023133.13 | 97                    |
| <i>GAPDH</i>    | CGGAGTCAACGGATTTGG<br>CCTGGAAGATGGTGTATGG      | 218               | NM_002046                                  | 101,9                 |
